# Supplementary material for: Epigenetic and Metabolic Changes in Root-Knot Nematode-Plant Interactions
Source: PubMed Central journal article supplement (PMC7589425; doi:10.3390/ijms21207759), 2020-10-20
Supplement: ijms-21-07759-s001.pdf [file ijms-21-07759-s001.pdf]

Table 1. Accession number, gene description, acronyms and primer sequences used in qRT-PCR.

| Accession number and Gene description                                  | Acronyms and Primer sequence (5'-3') |                      |
|------------------------------------------------------------------------|--------------------------------------|----------------------|
| NM_001247819.3<br>Cytosine-5 DNA methyl-transferase 1 (MET1), mRNA     | SIMET1-F                             | TGAAGGATGATGAAGAAC   |
|                                                                        | SIMET1-R                             | GTAGAAGAAGGTGTATGAG  |
| NM_001366667.1<br>Chromo methyl-transferase 2 (CMT2), mRNA             | SICMT2-F                             | CAGGTGAGGAATGAGTAT   |
|                                                                        | SICMT2-R                             | ATCAAGGAACAAGAGACA   |
| NM_001246974.3<br>DOMAINS REARRANGED METHYL-TRANSFERASE 5 (DRM5), mRNA | SIDRM5-F                             | TAAGTAGGACCGATAGATA  |
|                                                                        | SIDRM5-R                             | CCAGAGAAGAGTGATAAG   |
| NM_001308447.1<br>Actin-7 (ACT), mRNA                                  | ACT-F                                | CAGCAGATGTGGATCTCAAA |
|                                                                        | ACT-R                                | CTGTGGACAATGGAAGGAC  |
